# Supplementary material for: Detection of Toxoplasma gondii DNA in horse meat from supermarkets in France and performance evaluation of two serological tests
Source: PubMed Central journal article supplement (PMC4374124; doi:10.1051/parasite/2015014), 2015-03-25
Supplement: parasite150019-parasite-22-14-Material.pdf [file parasite150019-parasite-22-14-Material.pdf]

## Detection of *Toxoplasma gondii* DNA in horse meat from supermarkets in France and performance evaluation of two serological tests

Abdelkrim Aroussi<sup>1</sup>, Philippe Vignoles<sup>1</sup>, François Dalmay<sup>2</sup>, Laurence Wimel<sup>3</sup>, Marie-Laure Dardé<sup>1,4</sup>, Aurélien Mercier<sup>1</sup>, and Daniel Ajzenberg<sup>1,4,\*</sup>

<sup>1</sup> INSERM, Univ. Limoges, CHU Limoges, UMR-S 1094, Laboratoire de Parasitologie, 87000 Limoges, France

<sup>2</sup> INSERM, Univ. Limoges, CHU Limoges, UMR-S 1094, Institut d'Epidémiologie Neurologique et de Neurologie Tropicale, 87000 Limoges, France

<sup>3</sup> Institut Français du Cheval et de l'Équitation, Station Expérimentale, Domaine de la Valade, 19370 Chamberet, France

<sup>4</sup> Toxoplasma Biological Resource Center, CHU Limoges, 87042 Limoges, France

| Sample | Geographic origin | OD value ELISA | MAT (dilution)   | Mice bioassay (date) | MC-PCR Date, (Ct value) | MAT in mice |
|--------|-------------------|----------------|------------------|----------------------|-------------------------|-------------|
| 1      | Argentina         | 0.1698         | Positive (1:10)  | Done (1/31/2013)     | 2/20/2013 (41.17)       | Negative    |
| 2      | Mexico            | 0.17875        | Positive (1:40)  | Done (1/30/2013)     | 2/20/2013 (Negative)    | Negative    |
| 3      | Canada            | 0.1265         | Positive (1:10)  | Done (1/31/2013)     | 2/20/2013 (Negative)    | Negative    |
| 4      | Argentina         | 0.6608         | Positive (1:20)  | Done (1/30/2013)     | 2/20/2013 (36.20)       | Negative    |
| 5      | Argentina         | 0.1915         | Positive (1:10)  | Done (1/30/2013)     | 2/20/2013 (39.85)       | Negative    |
| 6      | Canada            | 0.0664         | Positive (1:10)  | Done (2/07/2013)     | 2/10/2013 (Negative)    | Negative    |
| 7      | Canada            | 0.0931         | Positive (1:10)  | Not done             | 2/10/2013 (Negative)    | Not done    |
| 8      | Canada            | 0.13495        | Positive (1:10)  | Done (1/30/2013)     | 2/20/2013 (40.14)       | Negative    |
| 9      | Canada            | 0.11245        | Positive (1:10)  | Not done             | 2/20/2013 (Negative)    | Not done    |
| 10     | Canada            | 0.7202         | Positive (1:40)  | Done (1/31/2013)     | 2/20/2013 (Negative)    | Negative    |
| 11     | Mexico            | 0.0622         | Positive (1:10)  | Not done             | 2/22/2013 (Negative)    | Not done    |
| 12     | France            | 0.10085        | Positive (1:10)  | Done (3/14/2013)     | 3/17/2013 (Negative)    | Negative    |
| 13     | Canada            | 0.1472         | Positive (1:10)  | Done (3/14/2013)     | 3/17/2013 (Negative)    | Negative    |
| 14     | France            | 0.0674         | Positive (1:10)  | Done (3/25/2013)     | 3/28/2013 (Negative)    | Negative    |
| 15     | Mexico            | 0.0544         | Positive (1:100) | Done (3/15/2013)     | 3/18/2013 (Negative)    | Negative    |
| 16     | Mexico            | 0.0771         | Positive (1:20)  | Done (3/19/2013)     | 5/07/2013 (Negative)    | Negative    |
| 17     | Canada            | 0.36375        | Positive (1:40)  | Done (3/19/2013)     | 5/07/2013 (Negative)    | Negative    |
| 18     | Argentina         | 0.18455        | Positive (1:10)  | Not done             | 5/07/2013 (Negative)    | Not done    |
| 19     | Argentina         | 0.2686         | Positive (1:20)  | Not done             | 5/07/2013 (Negative)    | Not done    |
| 20     | Canada            | 0.06355        | Positive (1:20)  | Done (3/19/2013)     | 5/07/2013 (Negative)    | Negative    |
| 21     | Argentina         | 0.0548         | Positive (1:10)  | Not done             | 5/07/2013 (Negative)    | Not done    |
| 22     | France            | 0.11875        | Positive (1:20)  | Not done             | 5/07/2013 (40.33)       | Not done    |
| 23     | Mexico            | 0.25185        | Positive (1:10)  | Done (3/25/2013)     | 3/28/2013 (Negative)    | Negative    |
| 24     | Mexico            | 0.29595        | Positive (1:10)  | Done (3/25/2013)     | 3/28/2013 (Negative)    | Negative    |
| 25     | Unknown           | 0.10115        | Positive (1:20)  | Not done             | 5/07/2013 (Negative)    | Not done    |
| 26     | Canada            | 0.132          | Positive (1:400) | Done (3/12/2013)     | 3/15/2013 (Negative)    | Negative    |
| 27     | Canada            | 0.0886         | Positive (1:20)  | Done (3/12/2013)     | 3/15/2013 (Negative)    | Negative    |
| 28     | Canada            | 0.21           | Positive (1:100) | Done (3/15/2013)     | 3/18/2013 (Negative)    | Negative    |
| 29     | Canada            | 0.25785        | Positive (1:40)  | Done (3/17/2013)     | 3/20/2013 (Negative)    | Negative    |
| 30     | Unknown           | 0.3198         | Positive (1:10)  | Done (3/25/2013)     | 3/28/2013 (Negative)    | Negative    |
| 31     | Argentina         | 0.26715        | Positive (1:10)  | Not done             | 5/7/2013 (Negative)     | Not done    |
| 32     | Argentina         | 0.24395        | Positive (1:10)  | Not done             | 5/7/2013 (38.40)        | Not done    |
| 33     | Canada            | 0.2282         | Positive (1:10)  | Done (3/12/2013)     | 3/15/2013 (Negative)    | Negative    |
| 34     | Canada            | 0.18925        | Positive (1:40)  | Done (3/17/2013)     | 3/20/2013 (Negative)    | Negative    |
| 35     | Canada            | 0.28675        | Positive (1:100) | Done (3/17/2013)     | 3/20/2013 (Negative)    | Negative    |
| 36     | France            | 0.1839         | Positive (1:10)  | Done (4/30/2013)     | 4/30/2013 (43.09)       | Negative    |
| 37     | Argentina         | 0.22415        | Negative         | Not done             | 4/30/2013 (Negative)    | Not done    |
| 38     | Mexico            | 0.15545        | Negative         | Not done             | 4/30/2013 (Negative)    | Not done    |
| 39     | Mexico            | 0.28705        | Negative         | Not done             | 4/30/2013 (Negative)    | Not done    |
| 40     | Canada            | 0.53955        | Negative         | Not done             | 5/7/2013 (Negative)     | Not done    |
| 41     | Canada            | 0.0893         | Negative         | Not done             | 5/7/2013 (Negative)     | Not done    |
| 42     | Canada            | 0.97195        | Negative         | Not done             | 5/7/2013 (Negative)     | Not done    |
| 43     | Canada            | 0.25675        | Negative         | Done (5/07/2013)     | 5/7/2013 (39.66)        | Negative    |
| 44     | Canada            | 0.0729         | Positive (1:10)  | Not done             | 5/7/2013 (Negative)     | Not done    |
| 45     | Canada            | 0.0677         | Negative         | Not done             | 5/7/2013 (Negative)     | Not done    |
| 46     | Unknown           | 0.10195        | Negative         | Done (6/05/2013)     | 6/5/2013 (39.22)        | Negative    |
| 47     | Unknown           | 0.0729         | Positive (1:10)  | Done (6/05/2013)     | 6/5/2013 (39.10)        | Negative    |
| 48     | Unknown           | 0.0821         | Positive (1:10)  | Done (6/05/2013)     | 6/5/2013 (42.18)        | Negative    |
| 49     | Unknown           | 0.1612         | Negative         | Not done             | 6/5/2013 (Negative)     | Not done    |
| 50     | Unknown           | 0.08135        | Negative         | Not done             | 6/5/2013 (Negative)     | Not done    |
| 51     | Unknown           | 0.3044         | Negative         | Done (6/05/2013)     | 6/5/2013 (38.15)        | Negative    |
| 52     | Unknown           | 0.05275        | Negative         | Not done             | 6/5/2013 (Negative)     | Not done    |
| 53     | Unknown           | 0.25915        | Negative         | Done (6/05/2013)     | 6/5/2013 (40.03)        | Negative    |

|     |           |        |                  |                   |                       |          |
|-----|-----------|--------|------------------|-------------------|-----------------------|----------|
| 54  | Canada    | 0.0726 | Positive (1:10)  | Done (7/29/2013)  | 7/29/2013 (36.47)     | Negative |
| 55  | Argentina | 0.3148 | Negative         | Done (7/29/2013)  | 7/29/2013 (40.91)     | Negative |
| 56  | Argentina | 0.0612 | Negative         | Done (7/29/2013)  | 7/29/2013 (41.01)     | Negative |
| 57  | Argentina | 0.0872 | Negative         | Done (7/29/2013)  | 7/29/2013 (38.27)     | Negative |
| 58  | Argentina | 0.2098 | Positive (1:100) | Done (12/12/2013) | 12/11/2013 (38.43)    | Negative |
| 59  | Argentina | 0.0782 | Positive (1:100) | Done (12/12/2013) | 12/11/2013 (36.44)    | Negative |
| 60  | Argentina | 0.1657 | Positive (1:100) | Done (12/12/2013) | 12/11/2013 ( 40.18)   | Negative |
| 61  | Argentina | 0.0901 | Negative         | Done (12/12/2013) | 12/11/2013 ( 37.09)   | Negative |
| 62  | Argentina | 0.1575 | Positive (1:400) | Done (12/12/2013) | 12/11/2013 ( 38.20)   | Negative |
| 63  | Argentina | 0.1893 | Negative         | Done (12/12/2013) | 12/11/2013 ( 38.14)   | Negative |
| 64  | Argentina | 0.1400 | Positive (1:100) | Done (12/12/2013) | 12/11/2013 ( 37.91)   | Negative |
| 65  | Argentina | 0.2628 | Positive (1:400) | Done (12/12/2013) | 12/11/2013 ( 37.85)   | Negative |
| 66  | Argentina | 0.4352 | Positive (1:100) | Done (12/12/2013) | 12/11/2013 ( 37.54)   | Negative |
| 67  | Argentina | 0.1888 | Positive (1:100) | Done (12/12/2013) | 12/11/2013 ( 37.69)   | Negative |
| 68  | Argentina | 0.0722 | Negative         | Not done          | 12/19/2013 (Negative) | Not done |
| 69  | Argentina | 0.0514 | Positive (1:100) | Not done          | 12/19/2013 (Negative) | Not done |
| 70  | Argentina | 0.5190 | Positive (1:10)  | Not done          | 12/19/2013 (Negative) | Not done |
| 71  | Argentina | 0.1772 | Positive (1:20)  | Done (12/20/2013) | 12/19/2013 ( 38.46)   | Negative |
| 72  | Canada    | 0.0766 | Positive (1:10)  | Done (12/20/2013) | 12/19/2013 ( 39.04)   | Negative |
| 73  | Canada    | 0.0542 | Positive (1:20)  | Not done          | 12/19/2013 (Negative) | Not done |
| 74  | Argentina | 0.1578 | Positive (1:20)  | Not done          | 12/19/2013 (Negative) | Not done |
| 75  | Argentina | 0.1910 | Positive (1:10)  | Done (12/20/2013) | 12/19/2013 ( 38.98)   | Negative |
| 76  | Canada    | 0.0613 | Positive (1:40)  | Done (12/20/2013) | 12/19/2013 ( 38.23)   | Negative |
| 77  | Canada    | 0.0499 | Positive (1:400) | Done (12/20/2013) | 12/19/2013 ( 40.68)   | Negative |
| 78  | Mexico    | 0.0747 | Positive (1:20)  | Done (1/09/2014)  | 1/8/2014 ( 38.91)     | Negative |
| 79  | Mexico    | 0.1887 | Positive (1:40)  | Done (1/09/2014)  | 1/8/2014 ( 38.83)     | Negative |
| 80  | Mexico    | 0.0776 | Positive (1:20)  | Not done          | 1/8/2014 (Negative)   | Not done |
| 81  | Mexico    | 0.0593 | Positive (1:20)  | Not done          | 1/8/2014 (Negative)   | Not done |
| 82  | Mexico    | 0.1445 | Negative         | Not done          | 1/19/2014 (Negative)  | Not done |
| 83  | Mexico    | 0.0549 | Positive (1:10)  | Not done          | 1/19/2014 (Negative)  | Not done |
| 84  | Mexico    | 0.0927 | Negative         | Not done          | 1/19/2014 (Negative)  | Not done |
| 85  | Mexico    | 0.0588 | Negative         | Not done          | 1/19/2014 (Negative)  | Not done |
| 86  | Mexico    | 0.0854 | Negative         | Not done          | 1/19/2014 (Negative)  | Not done |
| 87  | Mexico    | 0.0850 | Negative         | Not done          | 1/19/2014 (Negative)  | Not done |
| 88  | Mexico    | 0.0580 | Positive (1:10)  | Not done          | 1/19/2014 (Negative)  | Not done |
| 89  | Mexico    | 0.1621 | Negative         | Not done          | 1/19/2014 (Negative)  | Not done |
| 90  | Mexico    | 0.1048 | Negative         | Not done          | 1/19/2014 (Negative)  | Not done |
| 91  | Mexico    | 0.1646 | Positive (1:20)  | Not done          | 1/19/2014 (Negative)  | Not done |
| 92  | Mexico    | 0.0845 | Negative         | Not done          | 1/19/2014 (Negative)  | Not done |
| 93  | Mexico    | 0.1370 | Positive (1:20)  | Not done          | 1/19/2014 (Negative)  | Not done |
| 94  | Argentina | 0.1324 | Negative         | Done (2/18/2014)  | 2/17/2014 ( 37.94)    | Negative |
| 95  | Argentina | 0.0843 | Positive (1:100) | Not done          | 2/17/2014 (Negative)  | Not done |
| 96  | Argentina | 0.1276 | Negative         | Not done          | 2/17/2014 (Negative)  | Not done |
| 97  | Argentina | 0.0844 | Negative         | Not done          | 2/17/2014 (Negative)  | Not done |
| 98  | Argentina | 0.0961 | Positive (1:20)  | Not done          | 2/17/2014 (Negative)  | Not done |
| 99  | Argentina | 0.0582 | Positive (1:20)  | Not done          | 2/17/2014 (Negative)  | Not done |
| 100 | Argentina | 0.0801 | Positive (1:100) | Done (2/18/2014)  | 2/17/2014 ( 39.43)    | Negative |
| 101 | Canada    | 0.0965 | Negative         | Not done          | 2/19/2014 (Negative)  | Not done |
| 102 | Canada    | 0.1015 | Negative         | Not done          | 2/19/2014 (Negative)  | Not done |
| 103 | Canada    | 0.8272 | Negative         | Not done          | 2/19/2014 (Negative)  | Not done |
| 104 | Argentina | 0.1193 | Negative         | Not done          | 2/19/2014 (Negative)  | Not done |
| 105 | Argentina | 0.1660 | Positive (1:20)  | Not done          | 2/19/2014 (Negative)  | Not done |
| 106 | Argentina | 0.0515 | Negative         | Done (2/20/2014)  | 2/19/2014 ( 41.89)    | Negative |
| 107 | Argentina | 0.0798 | Positive (1:10)  | Not done          | 2/19/2014 (Negative)  | Not done |

|     |           |        |                  |                  |                      |          |
|-----|-----------|--------|------------------|------------------|----------------------|----------|
| 108 | Argentina | 0.1458 | Positive (1:10)  | Not done         | 2/19/2014 (Negative) | Not done |
| 109 | Argentina | 0.0770 | Positive (1:20)  | Done (2/20/2014) | 2/19/2014 ( 40.96)   | Negative |
| 110 | Argentina | 0.0671 | Positive (1:10)  | Not done         | 2/19/2014 (Negative) | Not done |
| 111 | Argentina | 0.3352 | Negative         | Not done         | 2/19/2014 (Negative) | Not done |
| 112 | Argentina | 0.1000 | Negative         | Not done         | 2/19/2014 (Negative) | Not done |
| 113 | Argentina | 0.0542 | Negative         | Not done         | 2/19/2014 (Negative) | Not done |
| 114 | Argentina | 0.0679 | Negative         | Not done         | 2/19/2014 (Negative) | Not done |
| 115 | Argentina | 0.0503 | Negative         | Not done         | 2/19/2014 (Negative) | Not done |
| 116 | Argentina | 0.0793 | Positive (1:400) | Not done         | 2/19/2014 (Negative) | Not done |
| 117 | Argentina | 0.0578 | Negative         | Not done         | 2/19/2014 (Negative) | Not done |
| 118 | Argentina | 0.2389 | Negative         | Not done         | 2/19/2014 (Negative) | Not done |
| 119 | Argentina | 0.0624 | Positive (1:10)  | Done (2/28/2014) | 2/27/2014 ( 39.65)   | Negative |
| 120 | Argentina | 0.0544 | Positive (1:10)  | Not done         | 2/27/2014 (Negative) | Not done |
| 121 | Argentina | 0.1246 | Negative         | Not done         | 2/27/2014 (Negative) | Not done |
| 122 | Argentina | 0.1788 | Positive (1:10)  | Done (2/28/2014) | 2/27/2014 ( 39.23)   | Negative |
| 123 | Argentina | 0.1202 | Positive (1:10)  | Not done         | 2/27/2014 (Negative) | Not done |
| 124 | Argentina | 0.5663 | Negative         | Not done         | 2/27/2014 (Negative) | Not done |
| 125 | France    | 0.1854 | Positive (1:20)  | Done (3/09/2014) | 3/8/2014 ( 42.32)    | Negative |
| 126 | France    | 0.1723 | Positive (1:20)  | Done (3/09/2014) | 3/8/2014 ( 41.89)    | Negative |
| 127 | France    | 0.4169 | Positive (1:20)  | Done (3/09/2014) | 3/8/2014 ( 38.62)    | Negative |
| 128 | Canada    | 0.7002 | Positive (1:40)  | Done (3/09/2014) | 3/8/2014 ( 41.27)    | Negative |
| 129 | Canada    | 0.5911 | Negative         | Not done         | 3/8/2014 (Negative)  | Not done |
| 130 | Canada    | 0.4476 | Negative         | Not done         | 3/12/2014 (Negative) | Not done |
| 131 | Canada    | 0.7918 | Negative         | Not done         | 3/12/2014 (Negative) | Not done |
| 132 | Canada    | 0.4693 | Positive (1:40)  | Done (3/13/2014) | 3/12/2014 ( 40.96)   | Negative |
| 133 | Canada    | 0.8738 | Negative         | Done (3/13/2014) | 3/12/2014 ( 41.33)   | Negative |
| 134 | Canada    | 0.4072 | Negative         | Not done         | 3/12/2014 (Negative) | Not done |
| 135 | Argentina | 0.8260 | Positive (1:40)  | Done (4/15/2014) | 4/14/2014 ( 35.81)   | Negative |
| 136 | Argentina | 0.7723 | Positive (1:100) | Done (4/15/2014) | 4/14/2014 ( 37.61)   | Negative |
| 137 | Argentina | 0.5686 | Positive (1:40)  | Done (4/15/2014) | 4/14/2014 ( 38.59)   | Negative |
| 138 | Canada    | 0.6401 | Negative         | Done (4/15/2014) | 4/14/2014 ( 38.49)   | Negative |
| 139 | Argentina | 0.0514 | Negative         | Done (4/15/2014) | 4/14/2014 ( 36.89)   | Negative |
| 140 | Argentina | 0.0474 | Positive (1:10)  | Not done         | 4/14/2014 (Negative) | Not done |
| 141 | Argentina | 0.0606 | Positive (1:10)  | Done (4/16/2014) | 4/14/2014 ( 37.17)   | Negative |
| 142 | Argentina | 0.1293 | Positive (1:20)  | Done (4/16/2014) | 4/14/2014 ( 36.25)   | Negative |
| 143 | Argentina | 0.1252 | Positive (1:10)  | Done (4/16/2014) | 4/14/2014 ( 37.53)   | Negative |
| 144 | Argentina | 0.0811 | Positive (1:20)  | Done (4/16/2014) | 4/14/2014 ( 38.51)   | Negative |
| 145 | Argentina | 0.0811 | Positive (1:20)  | Done (4/16/2014) | 4/14/2014 ( 36.56)   | Negative |
| 146 | Argentina | 0.0599 | Positive (1:40)  | Done (4/16/2014) | 4/14/2014 ( 42.60)   | Negative |
| 147 | Argentina | 0.0619 | Positive (1:40)  | Done (4/16/2014) | 4/14/2014 ( 37.85)   | Negative |
| 148 | Argentina | 0.4729 | Positive (1:40)  | Done (4/16/2014) | 4/14/2014 ( 38.22)   | Negative |
| 149 | Argentina | 0.1341 | Positive (1:10)  | Done (4/24/2014) | 4/23/2014 ( 33.78)   | Negative |
| 150 | Argentina | 1.0333 | Positive (1:10)  | Done (4/24/2014) | 4/23/2014 ( 35.97)   | Negative |
| 151 | Argentina | 0.0563 | Positive (1:10)  | Done (4/24/2014) | 4/23/2014 ( 35.53)   | Negative |
| 152 | Argentina | 0.0684 | Negative         | Done (4/24/2014) | 4/23/2014 ( 35.46)   | Negative |
| 153 | Argentina | 0.0795 | Positive (1:10)  | Done (4/24/2014) | 4/23/2014 ( 35.63)   | Negative |
| 154 | Argentina | 0.0999 | Positive (1:20)  | Done (4/24/2014) | 4/23/2014 ( 35.49)   | Negative |
| 155 | Argentina | 0.0670 | Positive (1:10)  | Done (4/24/2014) | 4/23/2014 ( 35.86)   | Negative |
| 156 | France    | 0.0615 | Positive (1:10)  | Done (4/24/2014) | 4/23/2014 ( 34.90)   | Negative |
| 157 | France    | 0.1071 | Negative         | Done (4/24/2014) | 4/23/2014 ( 36.27)   | Negative |
| 158 | Argentina | 0.2457 | Negative         | Done (4/24/2014) | 4/23/2014 ( 33.71)   | Negative |
| 159 | Argentina | 0.1650 | Negative         | Done (4/24/2014) | 4/23/2014 ( 35.91)   | Negative |
| 160 | Argentina | 0.1415 | Negative         | Done (4/24/2014) | 4/23/2014 ( 35.41)   | Negative |
| 161 | Unknown   | 0.7063 | Negative         | Not done         | 5/2/2014 (Negative)  | Not done |

|     |           |        |                  |                  |                      |          |
|-----|-----------|--------|------------------|------------------|----------------------|----------|
| 162 | Unknown   | 0.7214 | Negative         | Not done         | 5/2/2014 (Negative)  | Not done |
| 163 | Unknown   | 1.1785 | Positive (1:40)  | Not done         | 5/2/2014 (Negative)  | Not done |
| 164 | Unknown   | 1.1358 | Negative         | Not done         | 5/2/2014 (Negative)  | Not done |
| 165 | Unknown   | 0.1683 | Negative         | Done (5/03/2014) | 5/2/2014 ( 40.49)    | Negative |
| 166 | Unknown   | 0.0529 | Positive (1:40)  | Done (5/03/2014) | 5/2/2014 ( 40.28)    | Negative |
| 167 | Unknown   | 0.3587 | Positive (1:100) | Done (5/03/2014) | 5/2/2014 ( 40.55)    | Negative |
| 168 | Unknown   | 0.1789 | Negative         | Done (5/03/2014) | 5/2/2014 ( 39.50)    | Negative |
| 169 | Unknown   | 0.4527 | Positive (1:100) | Not done         | 5/2/2014 (Negative)  | Not done |
| 170 | Unknown   | 0.1209 | Positive (1:20)  | Done (5/09/2014) | 5/8/2014 ( 40.23)    | Negative |
| 171 | Unknown   | 0.4678 | Positive (1:40)  | Not done         | 5/8/2014 (Negative)  | Not done |
| 172 | Unknown   | 0.9565 | Negative         | Done (5/09/2014) | 5/8/2014 ( 45.44)    | Negative |
| 173 | Unknown   | 0.1087 | Negative         | Done (5/09/2014) | 5/8/2014 ( 40.09)    | Negative |
| 174 | Unknown   | 0.2025 | Positive (1:40)  | Not done         | 5/8/2014 (Negative)  | Not done |
| 175 | Unknown   | 0.0604 | Negative         | Done (5/09/2014) | 5/8/2014 ( 42.39)    | Negative |
| 176 | Unknown   | 0.0721 | Negative         | Not done         | 5/8/2014 (Negative)  | Not done |
| 177 | Unknown   | 0.0633 | Positive (1:100) | Not done         | 5/8/2014 (Negative)  | Not done |
| 178 | Unknown   | 0.4034 | Negative         | Done (4/15/2014) | 5/14/2014 ( 41.05)   | Negative |
| 179 | Unknown   | 0.2630 | Negative         | Done (4/15/2014) | 5/14/2014 ( 38.25)   | Negative |
| 180 | Unknown   | 0.0650 | Negative         | Not done         | 5/14/2014 (Negative) | Not done |
| 181 | Unknown   | 0.1357 | Positive (1:100) | Done (4/15/2014) | 5/14/2014 ( 39.06)   | Negative |
| 182 | Unknown   | 0.1689 | Positive (1:20)  | Not done         | 5/14/2014 (Negative) | Not done |
| 183 | Unknown   | 0.1532 | Positive (1:400) | Done (4/15/2014) | 5/14/2014 ( 41.03)   | Negative |
| 184 | Unknown   | 0.0785 | Positive (1:40)  | Done (4/15/2014) | 5/14/2014 ( 42.37)   | Negative |
| 185 | Unknown   | 0.1162 | Positive (1:100) | Done (4/15/2014) | 5/14/2014 ( 40.13)   | Negative |
| 186 | Unknown   | 0.1070 | Positive (1:100) | Done (4/15/2014) | 5/14/2014 ( 40.30)   | Negative |
| 187 | Unknown   | 0.0879 | Positive (1:100) | Not done         | 5/14/2014 (Negative) | Not done |
| 188 | Unknown   | 0.0738 | Positive (1:100) | Not done         | 5/14/2014 (Negative) | Not done |
| 189 | Unknown   | 0.0821 | Positive (1:100) | Not done         | 5/14/2014 (Negative) | Not done |
| 190 | Argentina | 1.0892 | Negative         | Not done         | 6/4/2014 (Negative)  | Not done |
| 191 | Argentina | 0.3642 | Negative         | Not done         | 6/4/2014 (Negative)  | Not done |
| 192 | Argentina | 0.2218 | Negative         | Not done         | 6/4/2014 (Negative)  | Not done |
| 193 | Allemagne | 0.2844 | Negative         | Not done         | 6/4/2014 (Negative)  | Not done |
| 194 | Allemagne | 0.3106 | Negative         | Done (6/05/2014) | 6/4/2014 ( 43.81)    | Negative |
| 195 | Mexico    | 0.3858 | Negative         | Not done         | 6/4/2014 (Negative)  | Not done |
| 196 | Argentina | 0.1807 | Positive (1:100) | Done (6/05/2014) | 6/4/2014 ( 44.71)    | Negative |
| 197 | Mexico    | 0.6581 | Positive (1:100) | Not done         | 6/4/2014 (Negative)  | Not done |
| 198 | Mexico    | 0.4767 | Positive (1:100) | Not done         | 6/4/2014 (Negative)  | Not done |
| 199 | Argentina | 0.0773 | Negative         | Not done         | 6/4/2014 (Negative)  | Not done |
| 200 | Argentina | 0.9201 | Positive (1:400) | Not done         | 6/4/2014 (Negative)  | Not done |
| 201 | Argentina | 0.8578 | Positive (1:40)  | Not done         | 6/4/2014 (Negative)  | Not done |
| 202 | Mexico    | 0.0997 | Positive (1:100) | Not done         | 6/4/2014 (Negative)  | Not done |
| 203 | Canada    | 0.1635 | Positive (1:100) | Not done         | 6/18/2014 (Negative) | Not done |
| 204 | Canada    | 0.1532 | Positive (1:100) | Not done         | 6/18/2014 (Negative) | Not done |
| 205 | Canada    | 0.1925 | Positive (1:100) | Not done         | 6/18/2014 (Negative) | Not done |
| 206 | Canada    | 0.1655 | Positive (1:40)  | Not done         | 6/18/2014 (Negative) | Not done |
| 207 | Argentina | 0.1652 | Negative         | Not done         | 6/18/2014 (Negative) | Not done |
| 208 | Argentina | 0.0975 | Negative         | Not done         | 6/18/2014 (Negative) | Not done |
| 209 | Argentina | 0.1508 | Negative         | Done (6/19/2014) | 6/18/2014 ( 38.38)   | Negative |
| 210 | Canada    | 0.0725 | Positive (1:40)  | Not done         | 6/18/2014 (Negative) | Not done |
| 211 | Canada    | 0.0738 | Negative         | Not done         | 6/18/2014 (Negative) | Not done |
| 212 | Uruguay   | 0.3389 | Negative         | Done (6/19/2014) | 6/18/2014 ( 38.57)   | Negative |
| 213 | Uruguay   | 0.3724 | Negative         | Done (6/19/2014) | 6/18/2014 ( 36.67)   | Negative |
| 214 | Unknown   | 0.2737 | Positive (1:40)  | Done (6/19/2014) | 6/18/2014 ( 35.88)   | Negative |
| 215 | France    | 0.0802 | Positive (1:40)  | Done (6/19/2014) | 6/18/2014 ( 39.86)   | Negative |

|     |           |        |                  |                  |                      |          |
|-----|-----------|--------|------------------|------------------|----------------------|----------|
| 216 | France    | 0.1337 | Positive (1:100) | Not done         | 6/18/2014 (Negative) | Not done |
| 217 | France    | 0.0748 | Negative         | Not done         | 6/18/2014 (Negative) | Not done |
| 218 | Argentina | 0.0998 | Negative         | Not done         | 6/18/2014 (Negative) | Not done |
| 219 | Argentina | 0.0767 | Negative         | Not done         | 6/18/2014 (Negative) | Not done |
| 220 | Argentina | 0.1229 | Negative         | Done (6/19/2014) | 6/18/2014 ( 38.70)   | Negative |
| 221 | Mexico    | 0.0783 | Negative         | Not done         | 6/18/2014 (Negative) | Not done |
| 222 | Mexico    | 0.0952 | Negative         | Not done         | 6/18/2014 (Negative) | Not done |
| 223 | Mexico    | 0.0633 | Negative         | Not done         | 6/18/2014 (Negative) | Not done |
| 224 | Uruguay   | 0.0599 | Negative         | Done (6/19/2014) | 6/18/2014 ( 37.94)   | Negative |
| 225 | Uruguay   | 0.1447 | Negative         | Not done         | 6/18/2014 (Negative) | Not done |
| 226 | France    | 0.0542 | Negative         | Done (6/19/2014) | 6/18/2014 ( 37.43)   | Negative |
| 227 | France    | 0.0547 | Negative         | Done (6/19/2014) | 6/18/2014 ( 41.51)   | Negative |
| 228 | Canada    | 0.1877 | Positive (1:400) | Done (6/19/2014) | 6/18/2014 ( 38.04)   | Negative |
| 229 | Canada    | 0.1670 | Positive (1:100) | Done (6/19/2014) | 6/18/2014 ( 34.31)   | Negative |
| 230 | Mexico    | 0.1759 | Negative         | Not done         | 6/18/2014 (Negative) | Not done |
| 231 | Argentina | 0.0613 | Negative         | Not done         | 6/18/2014 (Negative) | Not done |

---
